# Supplementary material for: Cost-effectiveness of multicomponent interventions in type 2 diabetes mellitus in a cluster randomised controlled trial: the INDICA study
Source: PubMed Central journal article supplement — BMJ Open. 2022 Apr 8;12(4):e058049. doi: 10.1136/bmjopen-2021-058049 (PMC8995956; doi:10.1136/bmjopen-2021-058049), 2022-04-08
Supplement: bmjopen-2021-058049supp002.pdf [file bmjopen-2021-058049supp002.pdf]

**Title:** Cost-effectiveness of multicomponent interventions in type 2 diabetes mellitus in a cluster randomized controlled trial: the INDICA Study

**Journal:** *BMJ Open*

**Authors:** García-Pérez et al

## Appendix 2. Description of mechanism for imputation of missed data.

Multiple imputation was performed by means of *mi impute chained* using the software Stata 15.0. Imputations were performed in a differentiated way for each of the four treatment groups. The following variables were considered regular and used as predictors to perform imputations: age of onset of the study, sex, baseline smoker status and baseline diabetes treatment. A total of 79 variables were imputed. Each variable was imputed in chronological order: baseline first and afterwards 3, 6, 12, 18 and 24 months. As a general rule, the latest available information of the variable to impute was used. When information from other variables was used the information from the same time moment was used. The imputation was not performed using secondary variables as random effects without fixed effects being used. A total of 90 imputations was performed for every missed data. For some imputations, predictor variables were omitted due to convergence problems.

The following table shows the order of imputation of the variables, the variables used in the imputation, the prediction model and the number of lost data for this variable.

|    | Imputed variable                     | Variables used in the imputation                                                                     | Imputation Model | N missed |
|----|--------------------------------------|------------------------------------------------------------------------------------------------------|------------------|----------|
| 1  | Mobility EQ-5D-5L, baseline          | Age, Sex, Diabetes treatment baseline, Duration of Diabetes                                          | mlogit           | 21       |
| 2  | Mobility EQ-5D-5L, 6 months          | Age, Sex, Diabetes treatment baseline, Duration of Diabetes, Mobility EQ-5D-5L baseline              | mlogit           | 573      |
| 3  | Mobility EQ-5D-5L, 12 months         | Age, Sex, Diabetes treatment baseline, Duration of Diabetes, Mobility EQ-5D-5L 6 months              | mlogit           | 670      |
| 4  | Mobility EQ-5D-5L, 18 months         | Age, Sex, Diabetes treatment baseline, Duration of Diabetes, Mobility EQ-5D-5L 12 months             | mlogit           | 745      |
| 5  | Mobility EQ-5D-5L, 24 months         | Age, Sex, Diabetes treatment baseline, Duration of Diabetes, Mobility EQ-5D-5L 18 months             | mlogit           | 671      |
| 6  | Self-care EQ-5D-5L, baseline         | Age, Sex, Diabetes treatment baseline, Duration of Diabetes, Mobility EQ-5D-5L baseline              | mlogit           | 27       |
| 7  | Self-care EQ-5D-5L, 6 months         | Age, Sex, Diabetes treatment baseline, Duration of Diabetes, Mobility EQ-5D-5L 6 months              | mlogit           | 577      |
| 8  | Self-care EQ-5D-5L, 18 months        | Age, Sex, Diabetes treatment baseline, Duration of Diabetes, Mobility EQ-5D-5L 18 months             | mlogit           | 743      |
| 9  | Usual activities EQ-5D-5L, baseline  | Age, Sex, Diabetes treatment baseline, Mobility EQ-5D-5L baseline                                    | mlogit           | 25       |
| 10 | Usual activities EQ-5D-5L, 6 months  | Age, Sex, Diabetes treatment baseline, Mobility EQ-5D-5L 6 months                                    | mlogit           | 578      |
| 11 | Usual activities EQ-5D-5L, 12 months | Age, Sex, Diabetes treatment baseline, Mobility EQ-5D-5L 12 months                                   | mlogit           | 671      |
| 12 | Usual activities EQ-5D-5L, 18 months | Age, Sex, Diabetes treatment baseline, Mobility EQ-5D-5L 18 months                                   | mlogit           | 750      |
| 13 | Usual activities EQ-5D-5L, 24 months | Age, Sex, Diabetes treatment baseline                                                                | mlogit           | 677      |
| 14 | Pain/Discomfort EQ-5D-5L, baseline   | Age, Sex, Diabetes treatment baseline, Mobility EQ-5D-5L baseline                                    | mlogit           | 22       |
| 15 | Pain/Discomfort EQ-5D-5L, 6 months   | Age, Sex, Diabetes treatment baseline, Mobility EQ-5D-5L 6 months, Pain/Discomfort EQ-5D-5L baseline | mlogit           | 575      |

|    | <b>Imputed variable</b>                     | <b>Variables used in the imputation</b>                                                                                                                                                                                                                           | <b>Imputation Model</b> | <b>N missed</b> |
|----|---------------------------------------------|-------------------------------------------------------------------------------------------------------------------------------------------------------------------------------------------------------------------------------------------------------------------|-------------------------|-----------------|
| 16 | Pain/Discomfort EQ-5D-5L, 12 months         | Age, Sex, Diabetes treatment baseline, Mobility EQ-5D-5L 12 months, Pain/Discomfort EQ-5D-5L 6 months                                                                                                                                                             | mlogit                  | 670             |
| 17 | Pain/Discomfort EQ-5D-5L, 18 months         | Age, Sex, Diabetes treatment baseline, Mobility EQ-5D-5L 18 months, Pain/Discomfort EQ-5D-5L 12 months                                                                                                                                                            | mlogit                  | 743             |
| 18 | Pain/Discomfort EQ-5D-5L, 24 months         | Age, Sex, Diabetes treatment baseline, Mobility EQ-5D-5L 24 months, Pain/Discomfort EQ-5D-5L 18 months                                                                                                                                                            | mlogit                  | 672             |
| 19 | Anxiety/Depression EQ-5D-5L, baseline       | Age, Sex, Diabetes treatment baseline, Mobility EQ-5D-5L Baseline, Usual activities EQ-5D-5L Baseline, Pain/Discomfort EQ-5D-5L baseline                                                                                                                          | mlogit                  | 32              |
| 20 | Anxiety/Depression EQ-5D-5L, 6 months       | Age, Sex, Diabetes treatment baseline, Mobility EQ-5D-5L 6 months, Usual activities EQ-5D-5L 6 months, Pain/Discomfort EQ-5D-5L 6 months, Anxiety/Depression EQ-5D-5L baseline                                                                                    | mlogit                  | 575             |
| 21 | Anxiety/Depression EQ-5D-5L, 12 months      | Age, Sex, Diabetes treatment baseline, Mobility EQ-5D-5L 12 months, Usual activities EQ-5D-5L 12 months, Pain/Discomfort EQ-5D-5L 12 months, Anxiety/Depression EQ-5D-5L 6 months                                                                                 | mlogit                  | 670             |
| 22 | Anxiety/Depression EQ-5D-5L, 18 months      | Age, Sex, Diabetes treatment baseline, Mobility EQ-5D-5L 18 months, Usual activities EQ-5D-5L 18 months, Pain/Discomfort EQ-5D-5L 18 months, Anxiety/Depression EQ-5D-5L 12 months                                                                                | mlogit                  | 745             |
| 23 | Anxiety/Depression EQ-5D-5L, 24 months      | Age, Sex, Diabetes treatment baseline, Mobility EQ-5D-5L 24 months, Usual activities EQ-5D-5L 24 months, Pain/Discomfort EQ-5D-5L 24 months, Anxiety/Depression EQ-5D-5L 18 months                                                                                | mlogit                  | 671             |
| 24 | VAS EQ-5D-5L, baseline                      | Age, Sex, Diabetes treatment baseline, Mobility EQ-5D-5L baseline, Usual activities EQ-5D-5L baseline, Pain/Discomfort EQ-5D-5L baseline, Anxiety/Depression EQ-5D-5L baseline                                                                                    | poisson                 | 47              |
| 25 | VAS EQ-5D-5L, 6 months                      | Age, Sex, Diabetes treatment baseline, Mobility EQ-5D-5L 6 months, Self-care EQ-5D-5L 6 months, Usual activities EQ-5D-5L 6 months, Pain/Discomfort EQ-5D-5L 6 months, Anxiety/Depression EQ-5D-5L 6 months, VAS EQ-5D-5L baseline                                | poisson                 | 584             |
| 26 | VAS EQ-5D-5L, 12 months                     | Age, Smoking status baseline, Mobility EQ-5D-5L 12 months, Pain/Discomfort EQ-5D-5L 12 months, Anxiety/Depression EQ-5D-5L 12 months, VAS EQ-5D-5L 6 months                                                                                                       | poisson                 | 686             |
| 27 | VAS EQ-5D-5L, 18 months                     | Age, Sex, Diabetes treatment baseline, Smoking status baseline, Mobility EQ-5D-5L 18 months, Self-care EQ-5D-5L 18 months, Usual activities EQ-5D-5L 18 months, Pain/Discomfort EQ-5D-5L 18 months, Anxiety/Depression EQ-5D-5L 18 months, VAS EQ-5D-5L 12 months | poisson                 | 746             |
| 28 | VAS EQ-5D-5L, 24 months                     | Age, Sex, Diabetes treatment baseline, Smoking status baseline, Mobility EQ-5D-5L 24 months, Usual activities EQ-5D-5L 24 months, Pain/Discomfort EQ-5D-5L 24 months, Anxiety/Depression EQ-5D-5L 24 months, VAS EQ-5D-5L 18 months                               | poisson                 | 679             |
| 29 | Lab tests by general practitioner, baseline | Age, Sex, Diabetes treatment baseline, Smoking status baseline, Comorbidity baseline, Pain/Discomfort EQ-5D-5L baseline, VAS EQ-5D-5L baseline                                                                                                                    | poisson                 | 70              |
| 30 | Lab tests by general practitioner, 3 months | Age, Sex, Smoking status baseline, Comorbidity baseline, Pain/Discomfort EQ-5D-5L 6 months, VAS                                                                                                                                                                   |                         | 490             |

|    | Imputed variable                             | Variables used in the imputation                                                                                                                                                               | Imputation Model | N missed |
|----|----------------------------------------------|------------------------------------------------------------------------------------------------------------------------------------------------------------------------------------------------|------------------|----------|
|    |                                              | EQ-5D-5L 6 months, Lab tests by general practitioner baseline                                                                                                                                  |                  |          |
| 31 | Lab tests by general practitioner, 6 months  | Age, Sex, Smoking status baseline, Comorbidity baseline, Pain/Discomfort EQ-5D-5L 6 months, VAS EQ-5D-5L 6 months, Lab tests by general practitioner 3 months                                  | poisson          | 593      |
| 32 | Lab tests by general practitioner, 12 months | Age, Comorbidity 12 months, Pain/Discomfort EQ-5D-5L 12 months, Lab tests by general practitioner 6 months                                                                                     | poisson          | 670      |
| 33 | Lab tests by general practitioner, 18 months | Age, Sex, Diabetes treatment baseline, Smoking status baseline, Comorbidity 12 months, Pain/Discomfort EQ-5D-5L 18 months, VAS EQ-5D-5L 18 months, Lab tests by general practitioner 12 months | poisson          | 746      |
| 34 | Lab tests by general practitioner, 24 months | Age, Sex, Comorbidity 24 months, Lab tests by general practitioner 18 months                                                                                                                   | poisson          | 676      |
| 35 | Lab tests by specialist, baseline            | Age, Diabetes treatment baseline, Comorbidity baseline                                                                                                                                         | poisson          | 83       |
| 36 | Lab tests by specialist, 3 months            | Age, Sex, Comorbidity baseline, Lab tests by specialist baseline                                                                                                                               |                  | 539      |
| 37 | Lab tests by specialist, 6 months            | Age, Sex, Diabetes treatment baseline, Smoking status baseline, Comorbidity baseline, Lab tests by specialist 3 months                                                                         | poisson          | 597      |
| 38 | Lab tests by specialist, 12 months           | Sex, Smoking status baseline, Comorbidity 12 months, Lab tests by specialist 6 months                                                                                                          | poisson          | 676      |
| 39 | Lab tests by specialist, 18 months           | Sex, Diabetes treatment baseline, Smoking status baseline, Comorbidity 12 months, Lab tests by specialist 12 months                                                                            | poisson          | 748      |
| 40 | Lab tests by specialist, 24 months           | Age, Sex, Diabetes treatment baseline, Comorbidity 24 months, Lab tests by specialist 18 months                                                                                                | poisson          | 677      |
| 41 | Retinography, baseline                       | Age, Sex, Diabetes treatment baseline, Smoking status baseline, Comorbidity baseline                                                                                                           | poisson          | 78       |
| 42 | Retinography, 3 months                       | Sex, Smoking status baseline, Comorbidity baseline, Retinography baseline                                                                                                                      | poisson          | 497      |
| 43 | Retinography, 6 months                       | Age, Sex, Diabetes treatment baseline, Smoking status baseline, Comorbidity baseline, Retinography 3 months                                                                                    | poisson          | 593      |
| 44 | Retinography, 12 months                      | Age, Smoking status baseline, Comorbidity 12 months                                                                                                                                            | poisson          | 669      |
| 45 | Retinography, 18 months                      | Age, Smoking status baseline, Comorbidity 12 months                                                                                                                                            | poisson          | 745      |
| 46 | Retinography, 24 months                      | Age, Sex, Diabetes treatment baseline, Smoking status baseline, Comorbidity 24 months, Retinography 18 months                                                                                  | poisson          | 676      |
| 47 | Visits to general practitioner, baseline     | Age, Sex, Diabetes treatment baseline, Comorbidity baseline, Usual activities EQ-5D-5L baseline, Pain/Discomfort EQ-5D-5L baseline, Anxiety/Depression EQ-5D-5L baseline                       | poisson          | 147      |

|    | Imputed variable                           | Variables used in the imputation                                                                                                                                                                                                                                                              | Imputation Model | N missed |
|----|--------------------------------------------|-----------------------------------------------------------------------------------------------------------------------------------------------------------------------------------------------------------------------------------------------------------------------------------------------|------------------|----------|
| 48 | Visits to general practitioner, 3 months   | Age, Sex, Smoking status baseline, Comorbidity baseline, Mobility EQ-5D-5L Baseline, Usual activities EQ-5D-5L baseline, Pain/Discomfort EQ-5D-5L baseline, Anxiety/Depression EQ-5D-5L baseline, Visits to general practitioner baseline                                                     | poisson          | 505      |
| 49 | Visits to general practitioner, 6 months   | Age, Sex, Diabetes treatment baseline, Smoking status baseline, Comorbidity baseline, Mobility EQ-5D-5L 6 months, Usual activities EQ-5D-5L 6 months, Pain/Discomfort EQ-5D-5L 6 months, Anxiety/Depression EQ-5D-5L 6 months, VAS EQ-5D-5L 6 months, Visits to general practitioner 3 months | poisson          | 615      |
| 50 | Visits to general practitioner, 12 months  | Age, Sex, Diabetes treatment baseline, Smoking status baseline, Comorbidity 12 months, Mobility EQ-5D-5L 12 months, Usual activities EQ-5D-5L 12 months, Pain/Discomfort EQ-5D-5L 12 months, Anxiety/Depression EQ-5D-5L 12 months, Visits to general practitioner 6 months                   | poisson          | 667      |
| 51 | Visits to general practitioner, 18 months  | Age, Sex, Diabetes treatment baseline, Smoking status baseline, Comorbidity 12 months, Usual activities EQ-5D-5L 12 months, Pain/Discomfort EQ-5D-5L 12 months, Anxiety/Depression EQ-5D-5L 12 months, Visits to general practitioner 12 months                                               | poisson          | 746      |
| 52 | Visits to general practitioner, 24 months  | Age, Sex, Diabetes treatment baseline, Smoking status baseline, Comorbidity 24 months, Mobility EQ-5D-5L 24 months, Pain/Discomfort EQ-5D-5L 24 months, Anxiety/Depression EQ-5D-5L 24 months, VAS EQ-5D-5L 24 months, Visits to general practitioner 18 months                               | poisson          | 672      |
| 53 | Visits to nurse at primary care, baseline  | Age, Sex, Smoking status baseline, Comorbidity baseline, Mobility EQ-5D-5L baseline, Usual activities EQ-5D-5L baseline, Pain/Discomfort EQ-5D-5L baseline, Anxiety/Depression EQ-5D-5L baseline                                                                                              | poisson          | 202      |
| 54 | Visits to nurse at primary care, 3 months  | Sex, Diabetes treatment baseline, Smoking status baseline, Comorbidity baseline, VAS EQ-5D-5L baseline, Visits to nurse at primary care baseline                                                                                                                                              | poisson          | 511      |
| 55 | Visits to nurse at primary care, 6 months  | Age, Sex, Smoking status baseline, Comorbidity baseline, Mobility EQ-5D-5L 6 months, Usual activities EQ-5D-5L 6 months, Pain/Discomfort EQ-5D-5L 6 months, Anxiety/Depression EQ-5D-5L 6 months, VAS EQ-5D-5L 6 months, Visits to nurse at primary care 3 months                             | poisson          | 626      |
| 56 | Visits to nurse at primary care, 12 months | Age, Sex, Smoking status baseline, Comorbidity 12 months, Mobility EQ-5D-5L 12 months, Usual activities EQ-5D-5L 12 months, Pain/Discomfort EQ-5D-5L 12 months, Anxiety/Depression EQ-5D-5L 12 months, VAS EQ-5D-5L 12 months, Visits to nurse at primary care 6 months                       | poisson          | 668      |
| 57 | Visits to nurse at primary care, 18 months | Sex, Comorbidity 12 months, Usual activities EQ-5D-5L 18 months, Pain/Discomfort EQ-5D-5L 18 months, Anxiety/Depression EQ-5D-5L 18 months, Visits to nurse at primary care 12 months                                                                                                         | poisson          | 747      |
| 58 | Visits to nurse at primary care, 24 months | Age, Sex, Comorbidity 24 months, Mobility EQ-5D-5L 24 months, Usual activities EQ-5D-5L 24 months, Pain/Discomfort EQ-5D-5L 24 months, Anxiety/Depression EQ-5D-5L 24 months, VAS EQ-5D-5L 24 months, Visits to nurse at primary care 18 months                                               | poisson          | 670      |

|    | <b>Imputed variable</b>                                      | <b>Variables used in the imputation</b>                                                                                                                                                                                                                                                                                | <b>Imputation Model</b> | <b>N missed</b> |
|----|--------------------------------------------------------------|------------------------------------------------------------------------------------------------------------------------------------------------------------------------------------------------------------------------------------------------------------------------------------------------------------------------|-------------------------|-----------------|
| 59 | Visits to endocrinologist, baseline                          | Age, Sex, Smoking status baseline, Comorbidity baseline, Usual activities EQ-5D-5L baseline, Pain/Discomfort EQ-5D-5L baseline, VAS EQ-5D-5L 12 months                                                                                                                                                                 | poisson                 | 227             |
| 60 | Visits to endocrinologist, 3 months                          | Age, Sex, Comorbidity baseline, Mobility EQ-5D-5L baseline, Usual activities EQ-5D-5L baseline, Pain/Discomfort EQ-5D-5L baseline, Anxiety/Depression EQ-5D-5L baseline, Visits to endocrinologist baseline                                                                                                            | poisson                 | 524             |
| 61 | Visits to endocrinologist, 6 months                          | Age, Sex, Comorbidity baseline, Mobility EQ-5D-5L 6 months, Pain/Discomfort EQ-5D-5L 6 months, VAS EQ-5D-5L 6 months, Visits to endocrinologist 3 months                                                                                                                                                               | poisson                 | 630             |
| 62 | Visits to endocrinologist, 12 months                         | Age, Comorbidity 12 months, Mobility EQ-5D-5L 12 months, Visits to endocrinologist 6 months                                                                                                                                                                                                                            | poisson                 | 668             |
| 63 | Visits to endocrinologist, 18 months                         | Sex, Comorbidity 12 months, Usual activities EQ-5D-5L 18 months, Pain/Discomfort EQ-5D-5L 18 months, VAS EQ-5D-5L 18 months, Visits to endocrinologist 12 months                                                                                                                                                       | poisson                 | 744             |
| 64 | Visits to endocrinologist, 24 months                         | Age, Sex, Smoking status baseline, Comorbidity 12 months, Usual activities EQ-5D-5L 24 months, Pain/Discomfort EQ-5D-5L 24 months, Anxiety/Depression EQ-5D-5L 24 months, VAS EQ-5D-5L 24 months, Visits to endocrinologist 18 months                                                                                  | poisson                 | 671             |
| 65 | Visit to accident & emergency (outpatient centre), baseline  | Sex, Diabetes treatment baseline, Smoking status baseline, Comorbidity baseline, Usual activities EQ-5D-5L baseline, Pain/Discomfort EQ-5D-5L baseline, Anxiety/Depression EQ-5D-5L baseline, VAS EQ-5D-5L baseline                                                                                                    | poisson                 | 229             |
| 66 | Visit to accident & emergency (outpatient centre), 3 months  | Age, Sex, Diabetes treatment baseline, Smoking status baseline, Comorbidity baseline, Pain/Discomfort EQ-5D-5L baseline, Anxiety/Depression EQ-5D-5L baseline, Visit to accident & emergency (outpatient centre) baseline                                                                                              | poisson                 | 535             |
| 67 | Visit to accident & emergency (outpatient centre), 6 months  | Age, Sex, Diabetes treatment baseline, Smoking status baseline, Comorbidity baseline, Mobility EQ-5D-5L 6 months, Pain/Discomfort EQ-5D-5L 6 months, Anxiety/Depression EQ-5D-5L 6 months, Visit to accident & emergency (outpatient centre) 3 months                                                                  | poisson                 | 632             |
| 68 | Visit to accident & emergency (outpatient centre), 12 months | Age, Sex, Diabetes treatment baseline, Smoking status baseline, Comorbidity 12 months, Mobility EQ-5D-5L 12 months, Usual activities EQ-5D-5L 12 months, Pain/Discomfort EQ-5D-5L 12 months, Anxiety/Depression EQ-5D-5L 12 months, VAS EQ-5D-5L 12 months, Visit to accident & emergency (outpatient centre) 6 months | poisson                 | 671             |
| 69 | Visit to accident & emergency (outpatient centre), 18 months | Sex, Comorbidity 12 months, Mobility EQ-5D-5L 18 months, Pain/Discomfort EQ-5D-5L 18 months, Anxiety/Depression EQ-5D-5L 18 months, Visit to accident & emergency (outpatient centre) 12 months                                                                                                                        | poisson                 | 748             |
| 70 | Visit to accident & emergency (outpatient centre), 24 months | Age, Sex, Diabetes treatment baseline, Comorbidity 24 months, Usual activities EQ-5D-5L 24 months, Pain/Discomfort EQ-5D-5L 24 months, Anxiety/Depression EQ-5D-5L 24 months, VAS EQ-5D-5L 24 months, Visit to accident & emergency (outpatient centre) 18 months                                                      | poisson                 | 672             |

|                             | <b>Imputed variable</b>                             | <b>Variables used in the imputation</b>                                                                                                                                                                                                             | <b>Imputation Model</b> | <b>N missed</b> |
|-----------------------------|-----------------------------------------------------|-----------------------------------------------------------------------------------------------------------------------------------------------------------------------------------------------------------------------------------------------------|-------------------------|-----------------|
| 71                          | Visit to accident & emergency (hospital), baseline  | Comorbidity baseline, Mobility EQ-5D-5L baseline, Pain/Discomfort EQ-5D-5L baseline, Anxiety/Depression EQ-5D-5L baseline                                                                                                                           | poisson                 | 243             |
| 72                          | Visit to accident & emergency (hospital), 3 months  | Comorbidity baseline, Mobility EQ-5D-5L baseline, Usual activities EQ-5D-5L baseline, Anxiety/Depression EQ-5D-5L baseline, VAS EQ-5D-5L baseline                                                                                                   | poisson                 | 532             |
| 73                          | Visit to accident & emergency (hospital), 6 months  | Age, Comorbidity baseline, Mobility EQ-5D-5L 6 months, Pain/Discomfort EQ-5D-5L 6 months, VAS EQ-5D-5L 6 months                                                                                                                                     | poisson                 | 630             |
| 74                          | Visit to accident & emergency (hospital), 12 months | Age, Sex, Diabetes treatment baseline, Smoking status baseline, Comorbidity 12 months, Mobility EQ-5D-5L 12 months, VAS EQ-5D-5L 12 months, Visit to accident & emergency (hospital) 6 months                                                       | poisson                 | 670             |
| 75                          | Visit to accident & emergency (hospital), 18 months | Age, Sex, Comorbidity 12 months, Mobility EQ-5D-5L 18 months, Usual activities EQ-5D-5L 18 months, Pain/Discomfort EQ-5D-5L 18 months, VAS EQ-5D-5L 18 months                                                                                       | poisson                 | 748             |
| 76                          | Visit to accident & emergency (hospital), 24 months | Sex, Diabetes treatment baseline, Comorbidity 24 months, Mobility EQ-5D-5L 24 months, Pain/Discomfort EQ-5D-5L 24 months, Visit to accident & emergency (hospital) 18 months                                                                        | poisson                 | 672             |
| 77                          | Hospital stays, Baseline                            | Age, Diabetes treatment baseline, Smoking status baseline, Comorbidity baseline, Pain/Discomfort EQ-5D-5L baseline, VAS EQ-5D-5L baseline, Visit to accident & emergency (hospital) baseline                                                        | poisson                 | 11              |
| 78                          | Hospital stays, 12 months                           | Age, Comorbidity 12 months, Mobility EQ-5D-5L 12 months, Usual activities EQ-5D-5L 12 months, Pain/Discomfort EQ-5D-5L 12 months, Anxiety/Depression EQ-5D-5L 12 months, VAS EQ-5D-5L 12 months, Visit to accident & emergency (hospital) 12 months | poisson                 | 664             |
| 79                          | Hospital stays, 24 months                           | Age, Mobility EQ-5D-5L 24 months                                                                                                                                                                                                                    | poisson                 | 670             |
| VAS, Visual Analogue Scale. |                                                     |                                                                                                                                                                                                                                                     |                         |                 |
